# Supplementary material for: Penalized robust estimating equation and variable selection in a partially linear single-index varying-coefficient model
Source: Research Square preprint supplement (doi:10.21203/rs.3.rs-6533938/v1), 2025-05-09
Supplement: Supplementary file 1 [file 7be635802ab9dbc566004a12.pdf]

## Supplementary material

# Penalized robust estimating equation and variable selection in a partially linear single-index varying-coefficient model

Gaorong Li<sup>1</sup>, Liugen Xue<sup>2</sup> and Riquan Zhang<sup>3</sup>

<sup>1</sup>*School of Statistics, Beijing Normal University, Beijing 100875, China*

<sup>2</sup>*School of Mathematics and Statistics, Henan University, Kaifeng 475004, China*

<sup>3</sup>*School of Statistics and Data Science, Shanghai University of International Business and Economics, Shanghai 201620, China*

## Appendix B. Proofs of Lemma A.1

The following three lemmas are useful for proving Lemmas A.1 given in the Appendix. Lemma B.1 is the lemma A.1 of Wang et al. (2010), and it can also be used when the variable  $t$  is removed. The proof of Lemma B.2 is similar to the proofs of Lemmas 1 and 2 in Zhu and Xue (2006). Lemma B.3 is the Theorem 1 of Xue (2023). Using Theorem 2 of Einmahl and Mason (2005), we can derive the first equation of Lemma B.4. The proof of the second equation of Lemma B.4 is similar to the proofs of Lemma 3 in Zhu and Xue (2006). Therefore, we omit their proofs. Let  $c$  represents a positive constant that does not depend on  $n$ , which may take a different value for each appearance.

*Lemma B.1.* Assume that  $\{\xi_i(t, \beta), 1 \leq i \leq n\}$  are random variables, and satisfy the following two conditions:

$$\frac{1}{n} \sum_{i=1}^n |\xi_i(t, \beta) - \xi_i(t_0, \beta_0)| \leq cn^a(|t - t_0| + \|\beta - \beta_0\|) \quad (\text{B.1})$$

for some constants  $c > 0$ ,  $a \geq 0$ ,  $t_0$  and  $\beta_0$ ;

$$P\left(\left|\frac{1}{n} \sum_{i=1}^n \xi_i(t, \beta)\right| > \varepsilon_n\right) \leq \frac{1}{2} \quad (\text{B.2})$$

for  $\beta \in \mathcal{B}_n$  and  $\varepsilon_n > 0$  depend only on  $n$ . Then

$$P\left(\sup_{(t, \beta) \in \mathcal{T}_\beta \times \mathcal{B}_n} \left|\frac{1}{n} \sum_{i=1}^n \xi_i(t, \beta)\right| > \varepsilon_n\right) \leq cn^{2pa} \varepsilon_n^{-2p} E\left\{\sup_{(t, \beta) \in \mathcal{T}_\beta \times \mathcal{B}_n} \exp\left(\frac{-n^2 \varepsilon_n^2 / 128}{\sum_{i=1}^n \xi_i^2(t, \beta)}\right) \wedge 1\right\},$$

---

<sup>0</sup>Corresponding author: Liugen Xue

<sup>0</sup>E-mail address: lgxue@bjut.edu.cn

where  $\mathcal{B}_n = \{\beta \mid \beta \in R^p, \|\beta - \beta_0\| \leq c_1 n^{-1/2}\}$  for a positive constant  $c_1$ , and  $\mathcal{T}_\beta$  is defined in condition (C1),

*Lemma B.2.* Assume that conditions (C1), (C2) and (C5)–(C7) hold. Then, we have, uniformly over  $1 \leq i \leq n$ ,

$$\begin{aligned} E \left\{ I_{\mathcal{T}_\beta}(\beta^T X_i) \left\| \sum_{j=1}^n W_{nj}(\beta^T X_i; \beta) \mathbf{g}^T(\beta^T X_j) Z_i - \mathbf{g}(\beta^T X_i) \right\|^2 \right\} &= O(n^{-4/5}), \\ E \left\{ I_{\mathcal{T}_\beta}(\beta^T X_i) \left\| \sum_{j=1}^n \widetilde{W}_{nj}(\beta^T X_i; \beta) \mathbf{g}^T(\beta^T X_j) Z_i - \mathbf{g}'(\beta^T X_i) \right\|^2 \right\} &= O(n^{-2/5}), \\ E \left\{ I_{\mathcal{T}_\beta}(\beta^T X_i) \sum_{j=1}^n \|W_{nj}(\beta^T X_i; \beta)\|^2 \right\} &= O(n^{-4/5}) \end{aligned}$$

and

$$E \left\{ I_{\mathcal{T}_\beta}(\beta^T X_i) \sum_{j=1}^n \|\widetilde{W}_{nj}(\beta^T X_i; \beta)\|^2 \right\} = O(n^{-2/5}),$$

where  $W_{nj}(\cdot; \beta)$ ,  $\widetilde{W}_{nj}(\cdot; \beta)$  and  $I_{\mathcal{T}_\beta}(\cdot)$  are defined in (2.3), (2.4) and (2.7), respectively.

*Lemma B.3.* Assume that conditions (C1)–(C3) and (C5)–(C7) in Section 3 hold. Then

$$\sup_{t \in \mathcal{T}_\beta, (\beta, \theta) \in \mathcal{B}_n^* \times \Theta_n} \|\hat{\mathbf{g}}(t; \beta, \theta) - \mathbf{g}(t)\| = O_P \left( n^{-2/5} \sqrt{\log n} \right)$$

and

$$\sup_{t \in \mathcal{T}_\beta, (\beta, \theta) \in \mathcal{B}_n^* \times \Theta_n} \|\hat{\mathbf{g}}'(t; \beta, \theta) - \mathbf{g}'(t)\| = O_P \left( n^{-1/5} \sqrt{\log n} \right),$$

where  $\mathcal{B}_n^* = \{\beta \mid \|\beta - \beta_0\| \leq c_1 n^{-1/2}\}$  for a positive constant  $c_1$ ,  $\hat{\mathbf{g}}(t; \beta, \theta)$ ,  $\hat{\mathbf{g}}'(t; \beta, \theta)$ ,  $\mathcal{T}_\beta$  and  $\Theta_n$  are defined in (2.1), (2.7) and (2.10), respectively, and  $\mathbf{g}'(t) = (\dot{g}_1(t), \dots, \dot{g}_q(t))^T$ .

*Lemma B.4.* Assume that conditions (C4)–(C7) hold. Then

$$\sup_{(t, z) \in \mathcal{T}_\beta \times \mathcal{Z}, \beta \in \mathcal{B}_n^*} \|\hat{m}_l(t, z; \beta) - m_l(t, z)\| = O_P \left( n^{-2/5} \sqrt{\log n} \right), \quad l = 1, 2$$

and uniformly over  $1 \leq i \leq n$ ,

$$E \left[ I_{\mathcal{T}_\beta}(\beta^T X_i) I_{\mathcal{Z}}(Z_i) |\hat{m}_{lk}(\beta^T X_i, Z_i; \beta) - m_{lk}(\beta^T X_i, Z_i)|^2 \right] = O(n^{-4/5}), \quad (\text{B.3})$$

where  $\hat{m}_{lk}$  and  $m_{lk}$  are the  $k$ th component of  $\hat{m}_l$  and  $m_l$  respectively,  $\hat{m}_1$ ,  $\hat{m}_2$ ,  $\mathcal{T}_\beta$ ,  $\mathcal{Z}$  and  $\mathcal{B}_n^*$  are defined in (2.4), (2.5), (2.7) and Lemma B.3, respectively.

*Proof of Lemma A.1.* Note that the second derivative of  $\psi(t)$  is 0. Therefore, by using the Taylor's formula, it can be obtained that for any point  $(\beta, \theta)$  in the neighborhood of  $(\beta_0, \theta_0)$ ,

$$\begin{aligned} &\psi(Y_i - \theta^T U_i - \hat{\mathbf{g}}^T(\beta^T X_i; \beta, \theta) Z_i) - \psi(\varepsilon_i) \\ &= \psi'(\varepsilon_i) \left[ (\theta_0 - \theta)^T U_i + \{\mathbf{g}(\beta_0^T X_i) - \hat{\mathbf{g}}(\beta^T X_i; \beta, \theta)\}^T Z_i \right]. \end{aligned} \quad (\text{B.4})$$

Using (B.4), Lemma B.3, the first equation of Lemma B.4, Taylor's formula and the law of large numbers, we can obtain that uniformly for  $\beta^{(r)} \in \mathcal{B}_n$  and  $\theta \in \Theta_n$ ,

$$\widehat{Q}(\beta^{(r)}, \theta) = Q_n(\beta^{(r)}, \theta) + H_1(\beta^{(r)}) + H_2(\beta^{(r)}) + H_3(\beta^{(r)}) + o_P(n^{-1/2}), \quad (\text{B.5})$$

where  $H_l(\beta^{(r)}) = (H_{l1}^T(\beta^{(r)}), H_{l2}^T(\beta^{(r)}))^T$ ,  $l = 1, 2$ ,  $H_3(\beta^{(r)}) = (H_{31}^T(\beta^{(r)}), 0)^T$ ,

$$\begin{aligned} H_{11}(\beta^{(r)}) &= \frac{1}{n} \sum_{i=1}^n I_{\mathcal{T}_\beta}(\beta^T X_i) I_{\mathcal{Z}}(Z_i) J_{\beta^{(r)}}^T \{m_1(\beta^T X_i, Z_i) - \hat{m}_1(\beta^T X_i, Z_i; \beta)\} \mathbf{g}'^T(\beta^T X_i) Z_i \psi(\varepsilon_i), \\ H_{12}(\beta^{(r)}) &= \frac{1}{n} \sum_{i=1}^n I_{\mathcal{T}_\beta}(\beta^T X_i) I_{\mathcal{Z}}(Z_i) \{m_2(\beta^T X_i, Z_i) - \hat{m}_2(\beta^T X_i, Z_i; \beta)\} \psi(\varepsilon_i), \\ H_{21}(\beta^{(r)}) &= \frac{1}{n} \sum_{i=1}^n I_{\mathcal{T}_\beta}(\beta^T X_i) I_{\mathcal{Z}}(Z_i) \{\mathbf{g}(\beta^T X_i) - \hat{\mathbf{g}}(\beta^T X_i; \beta, \theta)\}^T Z_i \mathbf{g}'^T(\beta^T X_i) Z_i J_{\beta^{(r)}}^T \widetilde{X}_i \psi'(\varepsilon_i), \\ H_{22}(\beta^{(r)}) &= \frac{1}{n} \sum_{i=1}^n I_{\mathcal{T}_\beta}(\beta^T X_i) I_{\mathcal{Z}}(Z_i) \{\mathbf{g}(\beta^T X_i) - \hat{\mathbf{g}}(\beta^T X_i; \beta, \theta)\}^T Z_i \widetilde{U}_i \psi'(\varepsilon_i), \\ H_{31}(\beta^{(r)}) &= \frac{1}{n} \sum_{i=1}^n I_{\mathcal{T}_\beta}(\beta^T X_i) I_{\mathcal{Z}}(Z_i) \{\mathbf{g}'(\beta^T X_i) - \hat{\mathbf{g}}'(\beta^T X_i; \beta^{(r)}, \hat{\theta})\}^T Z_i J_{\beta^{(r)}}^T \widetilde{X}_i \psi(\varepsilon_i), \end{aligned}$$

$\widetilde{X}_i = X_i - m_1(\beta^T X_i, Z_i)$  and  $\widetilde{U}_i = U_i - m_2(\beta^T X_i, Z_i)$ .

We first deal with  $H_{11}(\beta^{(r)})$ . Let  $m_{1k}(\beta^T X_i, Z_i)$  and  $\hat{m}_{1k}(\beta^T X_i, Z_i; \beta)$  represent the  $k$ th component of  $m_1(\beta^T X_i, Z_i)$  and  $\hat{m}_1(\beta^T X_i, Z_i; \beta)$ , and let

$$\xi_{ni}(\beta^{(r)}) = \sqrt{n} I_{\mathcal{T}_\beta}(\beta^T X_i) I_{\mathcal{Z}}(Z_i) \{m_{1k}(\beta^T X_i, Z_i) - \hat{m}_{1k}(\beta^T X_i, Z_i; \beta)\} \mathbf{g}'^T(\beta^T X_i) Z_i \psi(\varepsilon_i).$$

Using Lemma B.1, we have to verify (B.1) and (B.2). A simple calculation yields (B.1), so we now verify (B.2). From the second equation of Lemma B.4, conditions (C2), (C5) and (C7), and a simple calculation, we have

$$\begin{aligned} & E \left\{ \frac{1}{n} \sum_{i=1}^n \xi_{ni}(\beta^{(r)}) \right\}^2 \\ & \leq 2n^{-1} \sum_{i=1}^n E [I_{\mathcal{T}_\beta}(\beta^T X_i) I_{\mathcal{Z}}(Z_i) \{m_{1k}(\beta^T X_i, Z_i) - \hat{m}_{1k}(\beta^T X_i, Z_i; \beta)\}^2 \\ & \quad \times \{\mathbf{g}'^T(\beta^T X_i) Z_i\}^2 E\{\varepsilon_i^2 | X_i, Z_i\}] \leq cn^{-4/5}. \end{aligned}$$

Hence, by Chebyshev's inequality, for arbitrary  $\epsilon > 0$ , we have

$$P \left\{ \left| \frac{1}{n} \sum_{i=1}^n \xi_{ni}(\beta^{(r)}) \right| > \epsilon \right\} \leq cn^{-4/5} < \frac{1}{2}$$

when  $n$  large enough. This verifies that (B.2) of Lemma B.1 is satisfied. By the second equation of Lemma B.4 and conditions (C2), (C5) and (C7), when  $n$  large enough, we have

$$n^{-2} \sum_{i=1}^n E \{\xi_{ni}^2(\beta^{(r)})\} = O(n^{-4/5}).$$

This implies that  $n^{-2} \sum_{i=1}^n \xi_{ni}^2(\beta^{(r)}) = O_P(n^{-4/5})$ . Thus, from Lemma B.1 we have

$$P \left\{ \sup_{\beta^{(r)} \in \mathcal{B}_n} \left| \frac{1}{n} \sum_{i=1}^n \xi_{ni}(\beta^{(r)}) \right| > \epsilon \right\} \leq cn^{2pa} \exp(-cn^{4/5}) \longrightarrow 0, \quad \forall \epsilon > 0.$$

This proves that

$$\sup_{\beta^{(r)} \in \mathcal{B}_n} \|H_{11}(\beta^{(r)})\| = o_P(n^{-1/2}). \quad (\text{B.6})$$

Similarly, we can prove that

$$\sup_{\beta^{(r)} \in \mathcal{B}_n} \|H_{12}(\beta^{(r)})\| = o_P(n^{-1/2}). \quad (\text{B.7})$$

We now deal with  $H_{21}(\beta^{(r)})$ . Let  $\widetilde{X}_{ik}$  denotes the  $k$ th component of  $\widetilde{X}_i$ , and let

$$\tilde{\xi}_{ni}(\beta^{(r)}) = \sqrt{n} I_{\mathcal{T}_\beta}(\beta^T X_i) I_{\mathcal{Z}}(Z_i) \{ \mathbf{g}(\beta^T X_i) - \hat{\mathbf{g}}(\beta^T X_i; \beta, \theta_0) \}^T Z_i \mathbf{g}^T(\beta^T X_i) Z_i \widetilde{X}_{ik} \psi'(\varepsilon_i).$$

We yet use Lemma B.1. This need to verify that (B.1) and (B.2) of Lemma B.1 are satisfied. A simple calculation yields (B.1). We now verify (B.2). From Lemma B.2 and conditions (C2), (C5) and (C7), we have

$$\begin{aligned} & E \left\{ \frac{1}{n} \sum_{i=1}^n \tilde{\xi}_{ni}(\beta^{(r)}) \right\}^2 \\ & \leq 2n^{-1} \sum_{i=1}^n E \left[ \left| I_{\mathcal{T}_\beta}(\beta^T X_i) \left\{ \mathbf{g}(\beta^T X_i) - \sum_{j=1}^n W_{nj}(\beta^T X_i; \beta) \mathbf{g}^T(\beta^T X_j) Z_j \right\}^T Z_i \right|^2 \right. \\ & \quad \times \{ \mathbf{g}^T(\beta^T X_i) Z_i \}^2 E \{ \widetilde{X}_{ik}^2 | \beta^T X_i, Z_i \} \Big] + o(1) \\ & \quad + 2n^{-1} \sum_{i=1}^n \sum_{j=1}^n E [ I_{\mathcal{T}_\beta}(\beta^T X_i) \{ \mathbf{g}^T(\beta^T X_i) Z_i \}^2 W_{nj}^2(\beta^T X_i; \beta) \widetilde{X}_{ik}^2 \varepsilon_j^2 ] \\ & \leq cn^{-4/5} + o(1) + cn^{-1} \sum_{i=1}^n E \left\{ I_{\mathcal{T}_\beta}(\beta^T X_i) \sum_{j=1}^n W_{nj}^2(\beta^T X_i; \beta) \right\} \\ & \leq cn^{-4/5} + o(1) \longrightarrow 0. \end{aligned}$$

Thereupon, we can obtain that

$$P \left\{ \left| \frac{1}{n} \sum_{i=1}^n \tilde{\xi}_{ni}(\beta^{(r)}) \right| > \epsilon \right\} \leq cn^{-4/5} + o(1) < \frac{1}{2}$$

when  $n$  large enough. This verifies that (B.2) of Lemma B.1 is satisfied. By Lemma B.3 and conditions (C2), (C5) and (C7), we have

$$\frac{1}{n^2} \sum_{i=1}^n \tilde{\xi}_{ni}^2(\beta^{(r)}) = O_P(1) \quad \sup_{t \in \mathcal{T}_\beta, (\beta^{(r)}, \theta) \in \mathcal{B}_n \times \Phi_n} \|\mathbf{g}(t) - \hat{\mathbf{g}}(t; \beta, \theta)\|^2 = O_P(n^{-4/5} \log n).$$

Therefore, from Lemma B.2 we can obtain that

$$P \left\{ \sup_{\beta^{(r)} \in \mathcal{B}_n} \left| \frac{1}{n} \sum_{i=1}^n \tilde{\xi}_{ni}(\beta^{(r)}) \right| > \epsilon \right\} \leq cn^{2pa} \exp(-cn^{4/5}) \longrightarrow 0.$$

This implies that

$$\sup_{\beta^{(r)} \in \mathcal{B}_n} \|H_{21}(\beta^{(r)})\| = o_P(n^{-1/2}) \quad (\text{B.8})$$

Similarly, we can prove that

$$\sup_{\beta^{(r)} \in \mathcal{B}_n} \|H_{22}(\beta^{(r)})\| = o_P(n^{-1/2}) \quad (\text{B.9})$$

and

$$\sup_{\beta^{(r)} \in \mathcal{B}_n} \|H_{31}(\beta^{(r)})\| = o_P(n^{-1/2}) \quad (\text{B.10})$$

This, together with (B.5)–(B.10), completes the proof of Lemma A.1.

## References

- Einmahl, U., and Mason, D. M. (2005). Uniform in bandwidth consistency of kernel-type function estimators. *Ann. Stat.*, **33**, 1380–1403.
- Wang, J. L., Xue, L. G., Zhu, L. X. and Chong, Y. S. (2010) Estimation for a partial-linear single-index model. *Ann. Statist.*, **38**, 246–274.
- Xue, L. G. (2023). Two-stage estimation and bias-corrected empirical likelihood in a partially linear single-index varying-coefficient model. *J. Roy. Statist. Soc. B* **85**, 1299–1325.
- Zhu, L. X. and Xue, L. G. (2006). Empirical likelihood confidence regions in a partially linear single-index model. *J. Roy. Statist. Soc. B* **68**, 549–570.

## Appendix C. Simulation results of Example 1

**Table C.** Simulation results of Example 1. Estimates of the regression parameters and variable selection under different loss functions and penalty methods when  $n = 200$ .

| Loss | Method | $\hat{\beta}^T \beta_0$ and average number 0's |        |        |        |        | $\hat{\theta}$ and average number 0's |        |        |
|------|--------|------------------------------------------------|--------|--------|--------|--------|---------------------------------------|--------|--------|
|      |        | Mean                                           | Bias   | SD     | C      | I      | GMSE                                  | C      | I      |
| PSL  | FLEI   | 0.9978                                         | 0.0022 | 0.0013 | 4.9540 | 0.0020 | 0.1051                                | 2.9300 | 0.0080 |
|      | SCAD   | 0.9964                                         | 0.0026 | 0.0017 | 4.8580 | 0.0040 | 0.1185                                | 2.8700 | 0.0100 |
|      | ALASSO | 0.9963                                         | 0.0037 | 0.0016 | 4.8600 | 0.0040 | 0.1080                                | 2.8620 | 0.0100 |
|      | Oracle | 0.9974                                         | 0.0021 | 0.0011 | 5      | 0      | 0.1047                                | 3      | 0      |
| HL   | FLEI   | 0.9728                                         | 0.0272 | 0.1298 | 4.7720 | 0.0040 | 0.2678                                | 2.6740 | 0.0100 |
|      | SCAD   | 0.9663                                         | 0.0337 | 0.1551 | 4.7240 | 0.0060 | 0.2801                                | 2.6680 | 0.0120 |
|      | ALASSO | 0.9568                                         | 0.0432 | 0.1658 | 4.6860 | 0.0060 | 0.2772                                | 2.6680 | 0.0120 |
|      | Oracle | 0.9723                                         | 0.0269 | 0.1293 | 5      | 0      | 0.2672                                | 3      | 0      |
| SL   | FLEI   | 0.9649                                         | 0.0351 | 0.1399 | 4.7200 | 0.0060 | 0.2721                                | 2.6300 | 0.0110 |
|      | SCAD   | 0.9627                                         | 0.0373 | 0.1584 | 4.6400 | 0.0070 | 0.2810                                | 2.6220 | 0.0130 |
|      | ALASSO | 0.9538                                         | 0.0462 | 0.1602 | 4.6280 | 0.0070 | 0.2760                                | 2.6220 | 0.0130 |
|      | Oracle | 0.9643                                         | 0.0346 | 0.1392 | 5      | 0      | 0.2715                                | 3      | 0      |
